# Supplementary material
Source: PubMed Central journal article supplement (PMC9628764)
Supplement: mmc2.pdf [file mmc2.pdf]

## Alignment of Short Consensus Repeats Used in Phylogenetic Tree Inference

|                 |                                                                                               |
|-----------------|-----------------------------------------------------------------------------------------------|
| 1 FH            | DCNEL--PPRRNTEILT-GSWS----DQT--Y-PE-GTQAIYKCRPG-----YRSL--GN--VIMVCR-----KGE---WVAL-NPLRKCQK  |
| 2 FH            | PCGH---PGDTPFGTFT-LTG-----GNV--F-EY-GVKAVYTCNEG-----YQLL--GEI-NYRECDT----DG---WTND-IP--ICEV   |
| 3 FH            | KCLPVTAPENGGKIVSSA-MEP-----DRE--Y-FH-GQAVRFVCSNG-----YKIE--GD--EEMHCSD----DGF---WSKE-KP--KCVE |
| 4 FH            | SCKS---P-DVINGSPI-SQK-----II--Y-KE-NERFQYKCNMG-----YEYS--ER--GDAVCTE----SG---WR-P-LP--SCEE    |
| 5 FH            | SCDN---P-YIPNGDYS-PLR-----IK--H-RT-GDEITYQCRNG-----FYPA-TRG--NTAKCTS----TG---W-IP-AP--RCTL    |
| 6 FH            | PCDY---P-DIKHGGLY-HEN-----MRRPYFPVAVGKYYSYCCDEF-----HETP-SGSYWDHIHCTQ----DG---WS-P-AV--PCLR   |
| 7 FH            | KCYF---P-YLENGYNQ-NHG-----RK--F-VQ-GKSIDVACHPG-----YALP--KA-QTTVTCME----NG---WS-P-TP--RCIR    |
| 8 FH            | TCSKS--SIDIENGFIS-ESQ-----YT--Y-AL-KEKAKYQCKLG-----YVTA-DGETSGSIRCGK----DG---WS-A-QP--TCIK    |
| 9 FH            | SCDI---P-VFMNARTK-NDF-----TW--F-KL-NDTLDYECHDG-----YESN-TGSTTGSIVCGY----NG---WS-D-LP--ICYE    |
| 10 FH           | ECEL---P-KIDVHLVP-DRK-----KDQ--Y-KV-GEVLKFSCKPG-----FTIV--GP--NSVQCYF----HGL---SPD-LP--ICKE   |
| 11 FH           | SCGP---PELLNGNVK-EKT-----KEE--Y-GH-SEVVEYYCNPR-----FLMK--GP--NKIQCV-----DGE---WT-T-LP--VCIV   |
| 12 FH           | TCGDI--P-ELEHGWAQ-LSS-----PP--Y-YY-GDSVEFNCSES-----FTMI--GH--RSITCI-----HGV---W-TQ-LP--QCVA   |
| 13 FH           | KCKS---S-NLIILEEH-LKN-----KKE--F-DH-NSNIRYRCR-G-----KE--GW--IHTVCI-----NGR---W-DP-EV--NCSM    |
| 14 FH           | LCPP---PPQIPNSHNM-TTT-----LN--Y-RD-GEKVSVLCQEN-----YLIQ--EG--EEITCK-----DGR---WQ-S-IP--LCVE   |
| 15 FH           | PCSQ---PPQIEHGTIN-SSRSS---QES--Y-AH-GTKLSYTCCEG-----FRIS--EE--NETTCY-----MGK---WS-S-PP--QCEG  |
| 16 FH           | PCKS---PPEISHGVVA-HMS-----DS--Y-QY-GEEVYTKCFEG-----FGID--GP--AIKACL-----GEK---WS-H-PP--SCIK   |
| 17 FH           | DCLSL--P-SFENAIPM-GEK-----KDV--Y-KA-GEQVYTYCATY-----YKMD--GA--SNVTCI-----NSR---WT-G-RP--TCRD  |
| 18 FH           | SCVN---PPTVQNAIV-SRQ-----MSK--Y-PS-GERVRYQCRSP-----YEMF--GD--EEVMCL-----NGN---WT-E-PP--QCKD   |
| 19 FH           | KCGP---PPPIDNGDIT-SFP-----LSV--Y-AP-ASSVEYQCQNL-----YQLE--GN--KRITCR-----NGQ---WS-E-PP--KCLH  |
| 20 FH           | PCVIS--REIMENYNIA-LRWT----AKQKLYSRT-GESVEFVCKRG-----YRLS-SRSHTLRITCW----DGK---L-E-YP--TCAK    |
| 1 MCP           | ACEE---PPTFEAMELI-GKP-----KPY--Y-EI-GERVDYKCKKG-----YFYIP-PL-ATHITICDR----NHT---WLPV-SDD-ACYR |
| 2 MCP           | TCPYI--R-DPLNGQAV-PAN-----GT--Y-EF-GYQMHFICNEG-----YYLI--GE--EILYCEL----KGSVAIWSGK-PP--ICEK   |
| 3 MCP           | LCTP---PPKIKNGKHT-FSE-----VEV--F-EY-LDAVTYSCDPAPGP-DPFSLI--GE--STIYCGD----NSV---WSRA-AP--ECKV |
| 4 MCP           | KCRF---P-VVENGKQI-SGF-----GKK--F-YY-KATVMFECDKG-----FYLD--GS--DTIVCDS----NST---WDEP-VP--KCLK  |
| 1 DAF           | DCGL---PPDVPNAQPA-LEG-----RTS--F-PE-DTVITYKCEES-----FVKIP-GE-KDSVTCLK----GSQ---WSDI-EE--FCNR  |
| 2 DAF           | SCEV---PTRLNSASLKQPYIT---QNY--F-PV-GTVVEYECRPG-----YRRE--PSLSPKLTCLQ---NLK---WSTA-VE--FCKK    |
| 3 DAF           | SCPN---PGEIRNGQID-VPG-----GIL--F---GATISFSCNTG-----YKLF--GS--TSSFCLI---SGSSVQWSDP-LP--ECRE    |
| 4 DAF           | YCPA---PPQIDNGIIQ-GER-----DH--Y-GY-RQSVTYACNKG-----FTMI--GE--HSIYCTVNND-EGE---WSGP-PP--ECRG   |
| 1 C4bp $\alpha$ | NCGP---PPTLSFAAPMDITLT---ETR--F-KT-GTTLKYTCLPG-----YVRS-HST--QTLTCNS----DGE---WV-Y-NT--FCIY   |
| 1 IMP *         | CCPI---PSRPITMKFK-GTV-----DSH--Y-NI-GDTIEYLCLPG-----YRKQKMGP--IYAKCTG---TG---WT-L-FN--QCIK    |
| 1 SPICE Ind *   | CCTI---PSRPINMTFKNSVETDA--NAN--Y-NI-GDTIEYLCLPG-----YRKQKMGP--IYAKCTG---TG---WT-L-FN--QCIK    |
| 1 SPICE Bsh *   | CCTI---PSRPINMKFKNSVETDA--NAN--Y-NI-GDTIEYLCLPG-----YRKQKMGP--IYAKCTG---TG---WT-L-FN--QCIK    |
| 1 VCP *         | CCTI---PSRPINMKFKNSVETDA--NAN--Y-NI-GDTIEYLCLPG-----YRKQKMGP--IYAKCTG---TG---WT-L-FN--QCIK    |
| 2 C4bp $\alpha$ | RCRH---PGELRNGQVE-IKT-----DLS--F---GSQIEFSCSEG-----FFLI--GS--TTSRCEV-QD-RGVG---WSHP-LP--QCEI  |
| 2 IMP *         | RCPS---PRDIDNGQLD-IGG-----VD--F---GSSITYSCNSG-----YHLI--GE--SKSYCEL-GS-TGSMV-WNPE-AP--ICES    |
| 2 SPICE Ind *   | RCPS---PRDIDNGHLD-IGG-----VD--F---GSSITYSCNSG-----YHLI--GE--YKSYCKL-GS-TGSMV-WNPK-AP--ICES    |
| 2 SPICE Bsh *   | RCPS---PRDIDNGHLD-IGG-----VD--F---GSSITYSCNSG-----YHLI--GE--YKSYCKL-GS-TGSMV-WNPK-AP--ICES    |
| 2 VCP *         | RCPS---PRDIDNGQLD-IGG-----VD--F---GSSITYSCNSG-----YHLI--GE--SKSYCEL-GS-TGSMV-WNPE-AP--ICES    |
| 3 C4bp $\alpha$ | KCKP---PPDIRNGRHS-GEE-----NF--Y-AY-GFSVTYSCDPR-----FSLI--GHA-SIS-CTVENETIGV---WRPS-PP--TCEK   |
| 3 IMP *         | KCQS---PPSISNGRHN-GYE-----DF--Y-TD-GSVVTYSCNSG-----YSLI--GN--SGV LCS-----GGE---WSDP-P---TCQI  |
| 3 SPICE Ind *   | KCQL---PPSISNGRHN-GYN-----DF--Y-TD-GSVVTYSCNSG-----YSLI--GN--SGV LCS-----GGE---WSNP-P---TCQI  |
| 3 SPICE Bsh *   | KCQL---PPSISNGRHN-GYN-----DF--Y-TD-GSVVTYSCNSG-----YSLI--GN--SGV LCS-----GGE---WSNP-P---TCQI  |

3 VCP \* KCQS---PPSISNGRHN-GYE-----DF--Y-TD-GSVVTYSCNSG-----YSLI--GN--SGV LCS-----GGE---WSDP-P---TCQI  
4 C4bpα TCRK---P-DVSHGEMV-SGF-----GPI--Y-NY-KDTIVFKCQKG-----FVLR--GS--SVIHCA-----DSK---WNPS-PP--ACEP  
4 IMP \* KCPH---P-TISNGYLS-SGF-----KRS--Y-SY-NDNVDFKCKYG-----YKLS--GS--SSSTCS-----PGNT--WQPE-LP--KCVR  
4 SPICE Ind \* KCPH---P-TILNGYLS-SGF-----KRS--Y-SY-NDNVDFKCKYG-----YKLS--GS--SSSTCS-----PGNT--WQPE-LP--KCVR  
4 SPICE Bsh \* KCPH---P-TISNGYLS-SGF-----KRS--Y-SY-NDNVDFKCKYG-----YKLS--GS--SSSTCS-----PGNT--WQPE-LP--KCVR  
4 VCP \* KCPH---P-TISNGYLS-SGF-----KRS--Y-SY-NDNVDFKCKYG-----YKLS--GS--SSSTCS-----PGNT--WKPE-LP--KCVR  
5 C4bpα SCINL--P-DIPHASWE-TYP-RPTKEDV--Y-VV-GTVLRYRCHPG-----YKPT-TDE-PTTVICQK----NLR---WT-P-YQ--GCEA  
6 C4bpα CCPE---P-KLNNGEITQHRKSRPANHCV--Y-FY-GDEISFSCHET-----SR---FSAICQG----DGT---WSPR-TP--SCGD  
7 C4bpα -CNF---PPKIAHGHIYKQ-SS-----S--YSFF-KEEIIYECDKG-----YILV--GQ--AKLSCSY----SH----WSAP-AP--QCKA  
8 C4bpα -CRK---P-ELVNGRLS-VDK-----DQ--Y-VE-PENVTIQCD SG-----YGVV--GP--QSITCS-----GNRT-WYPE-VP--KCEW  
1 CR2 SCGS---PPPILNGRIS-YY S-----TP--I-AV-GTVIRYSCSGT-----FRLI--GE--KSLLCITKDKVDGT---WDKP-AP--KCEY  
2 CR2 SCPE---P-IVPGGYKI-RGS-----TP--Y-RH-GDSVTFACKTN-----FSMN--GN--KSVWCQA----NNM---WGPTRLP--TCVS  
3 CR2 ECPA---LPMIHNGHHT-SEN-----VGS--I-AP-GLSVTYSCESG-----YLLV--GE--KIINCLS----SGK---WSAV-PP--TCEE  
4 CR2 RCKS---LGRFPNGKVK-EPP-----IL---RV-GVTANFFCDEG-----YRLQ--GP--PSSRCVI----AGQGVAVT-K-MP--VCEE  
5 CR2 FCPS---PPPILNGRHI-GNS-----LAN--V-SY-GSIVTYTCDPDPEEGVNFIL I--GE--STLRCTVDSQKTGT---WSGP-AP--RCEL  
6 CR2 QCPH---P-QILRGRMV-SGQ-----KDR--Y-TY-NDTVIFACMFG-----FTLK--GS--KQIRCNA----QGT---WEPS-AP--VCEK  
7 CR2 ECQA---PPNILNGQKE-DRH-----MVR--F-DP-GTSIKYSCNPG-----YVLV--GE--ESIQCTS----EGV---WTPP-VP--QCKV  
8 CR2 ACEA-----TGRQL-LTKP---QH Q--F--V-RPDVNSSCGEG-----YKLS--GS--VYQECQ-----GTIP-WFME-IR--LCKE  
9 CR2 TCPP---PPVIYNGAHT-GSSL-----ED--F-PY-GTTVTYTCNPGPERGVEFSLI--GE--STIRCTSNDQERGT---WSGP-AP--LCKL  
10 CR2 QCSH---V-HIANGYKI-SGK-----EAP--Y-FY-NDTVTFKCYSG-----FTLK--GS--SQIRCKA----DNT---WDPE-IP--VCEK  
11 CR2 TCQH---VRQSLQEL-PAG-----SR-VELVNTFCQDG-----YQLT--GH--AYQMCQDAE--NGI---WFKK-IP--LCKV  
12 CR2 HCHP---PPVIVNGKHT-GMM-----AEN--F-LY-GNEVSYECDQG-----FYLL--GE--KKLQCRSDSKGHGS---WSGP-SP--QCLR  
13 CR2 RCPN---P-EVKHGYKL-NKT-----HSA--Y-SH-NDIVYVDCNPG-----FIMN--GS--RVIRCHT----DNT---WVPG-VP--TCIK  
14 CR2 GCPP---PPKTPNGNHT-GGN-----IAR--F-SP-GMSILYSCDQG-----YLLV--GE--ALLLCTH----EGT---WSQP-AP--HCKE  
15 CR2 NCSS---P-ADMDGIQKGLEP-----RKM--Y-QY-GAVVTLECEDG-----YMLE--GS--PQSQCQS----DHQ---WNPP-LA--VCRS  
1 CR1 QCNA---PEWLPFARPTNLTD-----EFE--F-PI-GTYLNYECPG-----YS-G--RP--FSIICLK----NSV---WTGA-KD--RCRR  
2 CR1 SCR N---PPDPVNGMVH-VIK-----GI---QF-GSQIKYSCTKG-----YRLI--GS--SSATCII----SGDTVIWDNE-TP--ICDR  
3 CR1 PCGL---PPTITNGDFI-STN-----REN--F-HY-GSVVTYRCNPGSGGRKVFELV--GE--PSIYCTSNDQVGI---WSGP-AP--QCII  
4, 11, 18 CR1 KCTP---P-NVENGILV-SDN-----RSL--F-SL-NEVVEFRCQPG-----FVMK--GP--RRVKCQA----LNK---WEPE-LP--SCSR  
5, 12 CR1 VCQP---PPDVLHAERT-QRD-----KDN--F-SP-GQEVFYSCEPG-----YDLR--GA--ASMRCTP----QGD---WSPA-AP--TCEV  
6, 13 CR1 SCDDF--MGQLLNGRVL-FPV-----NL---QL-GAKVDFVCDEG-----FQLK--GS--SASYCVL----AGMESLWNSS-VP--VCEQ  
7, 14 CR1 FCPS---PPVIPNGRHT-GKP-----LEV--F-PF-GKAVNYTCDPHDRGTSFDLI--GE--STIRCTSDPQGNV---WSSP-AP--RCGI  
8, 15 CR1 HCQA---PDHFLFAKLKTQTN-----ASD--F-PI-GTSLKYECRPE-----YY-G--RP--FSITCLD----NLV---WSSP-KD--VCKR  
9 CR1 SCKT---PPDPVNGMVH-VIT-----DI---QV-GSRINYSCTTG-----HRLI--GH--SSAECIL----SGNAAHWSTK-PP--ICQR  
10 CR1 PCGL---PPTIANGDFI-STN-----REN--F-HY-GSVVTYRCNPGSGGRKVFELV--GE--PSIYCTSNDQVGI---WSGP-APCDQCII  
16 CR1 SCKT---PPDPVNGMVH-VIT-----DI---QV-GSRINYSCTTG-----HRLI--GH--SSAECIL----SGNTAHWSTK-PP--ICQR  
17 CR1 PCGL---PPTIANGDFI-STN-----REN--F-HY-GSVVTYRCNLGSRGRKVFELV--GE--PSIYCTSNDQVGI---WSGP-AP--QCII  
19 CR1 VCQP---PPEILHGEHT-PSH-----QDN--F-SP-GQEVFYSCEPG-----YDLR--GA--ASLHCTP----QGD---WSPE-AP--RCAV  
20 CR1 SCDDF--LGQLPHGRVL-FPL-----NL---YL-GAKVDFVCDEG-----FRLK--GS--SVSHCVL----VGM RSLWNSS-VP--VCEH  
21 CR1 FCPN---PPAILNGRHT-GTPS-----GDI---QV-GKEISYTCDPHDPDRGMTFNLI--GE--STIRCTSDPHGNGV---WSSP-AP--RCEL  
22 CR1 HCKT---PEQFPFASPTIPIN-----DFE--F-PV-GTSLNYECPG-----YF-G--KM--FSISCLE----NLV---WSSV-ED--NCRR  
23 CR1 SCGP---PPEPFNGMVH-INT-----DT---QF-GSTVNYSCNEG-----FRLI--GS--PSTTCLV----SGNNVTWDKK-AP--ICEI  
24 CR1 SCEP---PPTISNGDFY-SNN-----RTS--F-HN-GTVVTYQCHTGP DGEQLFELV--GE--RSIYCTSKDDQVGV---WSSP-PP--RCIS

25 CR1 KCTA---P-EVENAIRV-PGN-----RSF--F-SL-TEIIRFRCQPG-----FVMV--GS--HTVQCQT----NGR---WGPK-LP--HCSR  
26 CR1 VCQP---PPEILHGEHT-LSH-----QDN--F-SP-GQEVFYSCPS-----YDLR--GA--ASLHCTP----QGD---WSPE-AP--RCTV  
27 CR1 SCDDF--LGQLPHGRVL-LPL-----NL----QL-GAKVSFVCEG-----FRLK--GR--SASHCVL----AGMKALWNSS-VP--VCEQ  
28 CR1 FCPN---PPAILNGRHT-GTPF----GDI----PY-GKEISYACDTHPDRGMTFNLI--GE--SSIRCTSDPQNGV---WSSP-AP--RCEL  
29 CR1 ACPH---PPKIQNGHYI-GGH-----VSL--Y-LP-GMTISYTCDPG-----YLLV--GK--GFIFCTD----QGI---WSQL-DH--YCKE  
30 CR1 NCSF---P-LFMNGISKELEM-----KKV--Y-HY-GDYVTLKCEDG-----YTLE--GS--PWSQCQA----DDR---WDPP-LA--KCT-
