# Supplementary material
Source: PubMed Central journal article supplement (PMC9628764)
Supplement: mmc5.pdf [file mmc5.pdf]

### Protein Sequences Analyzed

| Symbol        | Protein                                   | Organism                                    | GenBank accession       | Number of SCRs <sup>a</sup> | E-value of blastp comparison <sup>b</sup> |                     |
|---------------|-------------------------------------------|---------------------------------------------|-------------------------|-----------------------------|-------------------------------------------|---------------------|
|               |                                           |                                             |                         |                             | to C4bp $\alpha$                          | to FH               |
| VCP (C3L)     | Vaccinia virus complement control protein | Vaccinia virus, strain WR                   | <b><u>P68638</u></b>    | 4                           | $2 \times 10^{-44}$                       | $1 \times 10^{-21}$ |
| SPICE (D12L)  | Smallpox inhibitor of complement enzymes  | Variola major virus, strain India-1967      | <b><u>NP_042056</u></b> | 4                           | $2 \times 10^{-41}$                       | $4 \times 10^{-20}$ |
| SPICE (D15L)  | Smallpox inhibitor of complement enzymes  | Variola major virus, strain Bangladesh-1975 | <b><u>T28450</u></b>    | 4                           | $2 \times 10^{-41}$                       | $4 \times 10^{-20}$ |
| IMP (C17L)    | Inflammation modulatory protein           | Cowpox virus, strain GRI-90                 | <b><u>CAA64102</u></b>  | 4                           | $5 \times 10^{-45}$                       | $9 \times 10^{-24}$ |
| FH            | Factor H                                  | Human                                       | <b><u>CAA68704</u></b>  | 20                          | $1 \times 10^{-37}$                       | 0.0                 |
| C4bp $\alpha$ | C4 binding protein, $\alpha$ chain        | Human                                       | <b><u>AAA36507</u></b>  | 8                           | 0.0                                       | $3 \times 10^{-36}$ |
| MCP           | Membrane cofactor protein                 | Human                                       | <b><u>P15529</u></b>    | 4                           | $6 \times 10^{-41}$                       | $2 \times 10^{-19}$ |
| DAF           | Decay accelerating factor                 | Human                                       | <b><u>P08174</u></b>    | 4                           | $4 \times 10^{-37}$                       | $3 \times 10^{-13}$ |
| CR1           | Complement receptor type 1                | Human                                       | <b><u>P17927</u></b>    | 30                          | $2 \times 10^{-59}$                       | $4 \times 10^{-77}$ |
| CR2           | Complement receptor type 2                | Human                                       | <b><u>P20023</u></b>    | 15                          | $3 \times 10^{-66}$                       | $1 \times 10^{-45}$ |

<sup>a</sup>The number of SCRs listed for each sequence corresponds to the GenBank accession number provided. See text for the description of the allelic variation in the number of SCRs in the CR1 and CR2 proteins.

<sup>b</sup>The E-values are provided for blastp similarity searches at the National Center for Biotechnology Information BLAST server ([www.ncbi.nlm.nih.gov/blast/](http://www.ncbi.nlm.nih.gov/blast/)) using as queries full length sequences of C4bp $\alpha$  and FH with accession numbers listed above. Due to the different number of SCRs in each protein, the E-values for the full length sequences do not directly correspond to the degree of sequence similarity between the individual SCRs.
