# Supplementary material
Source: PubMed Central journal article supplement (PMC9628764)

### Human SCRs

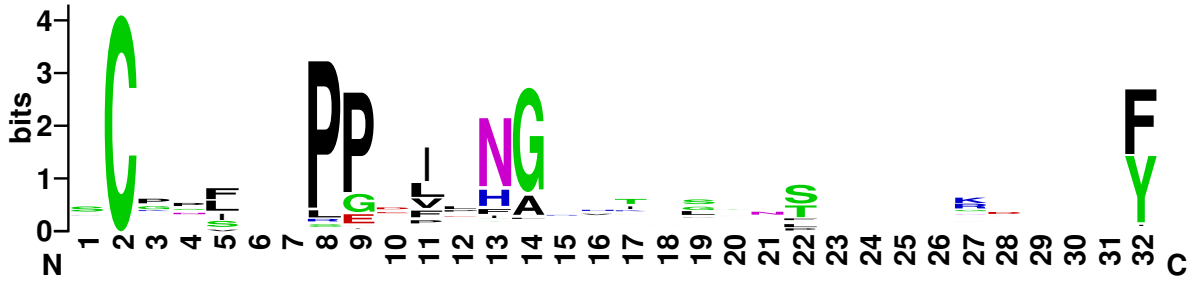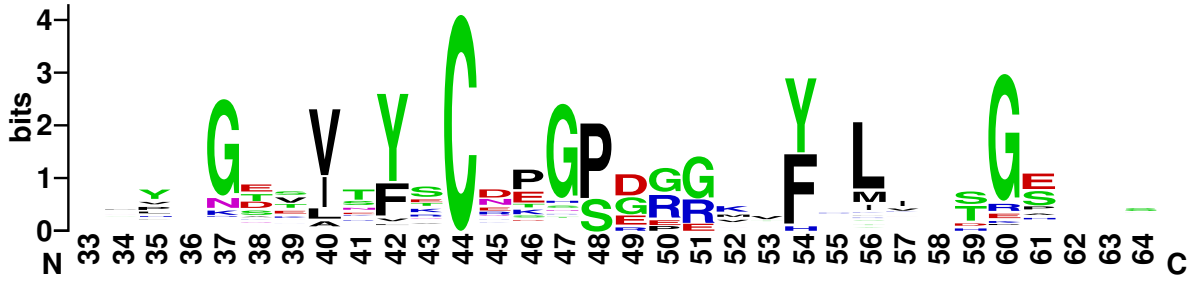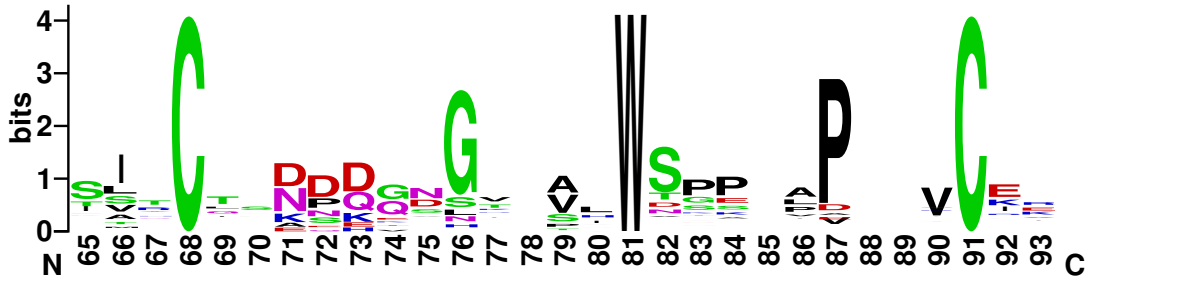

### Poxvirus SCRs

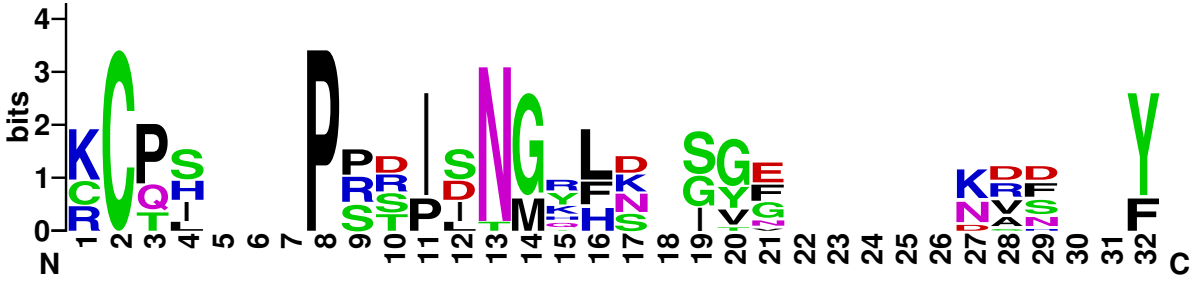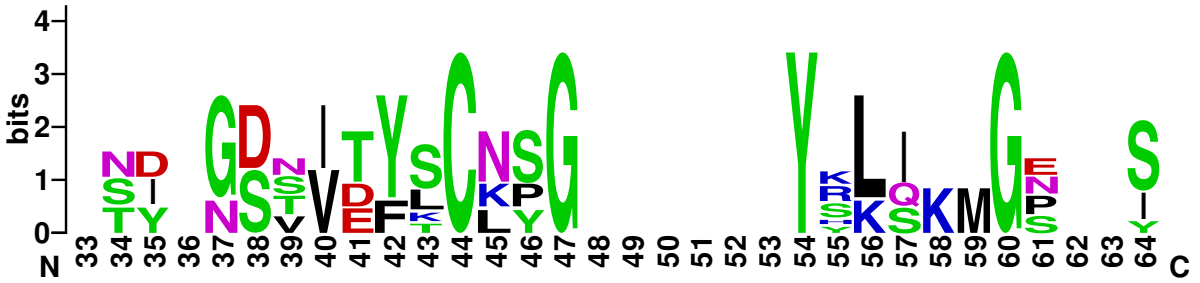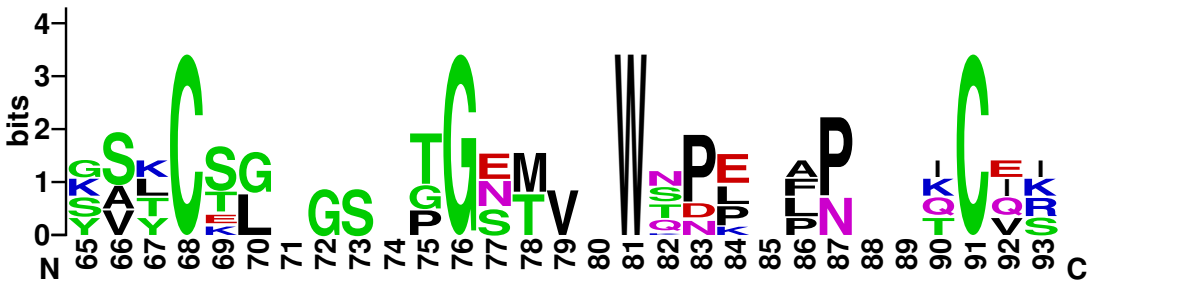

Supplement: mmc3.pdf [file mmc3.pdf]

# Human SCRs

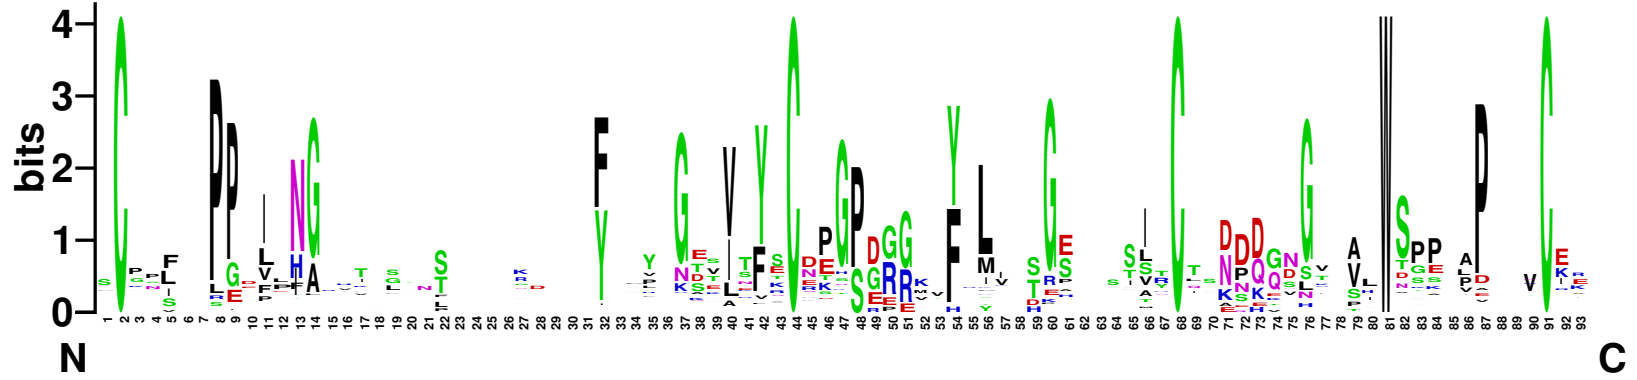

# Poxvirus SCRs

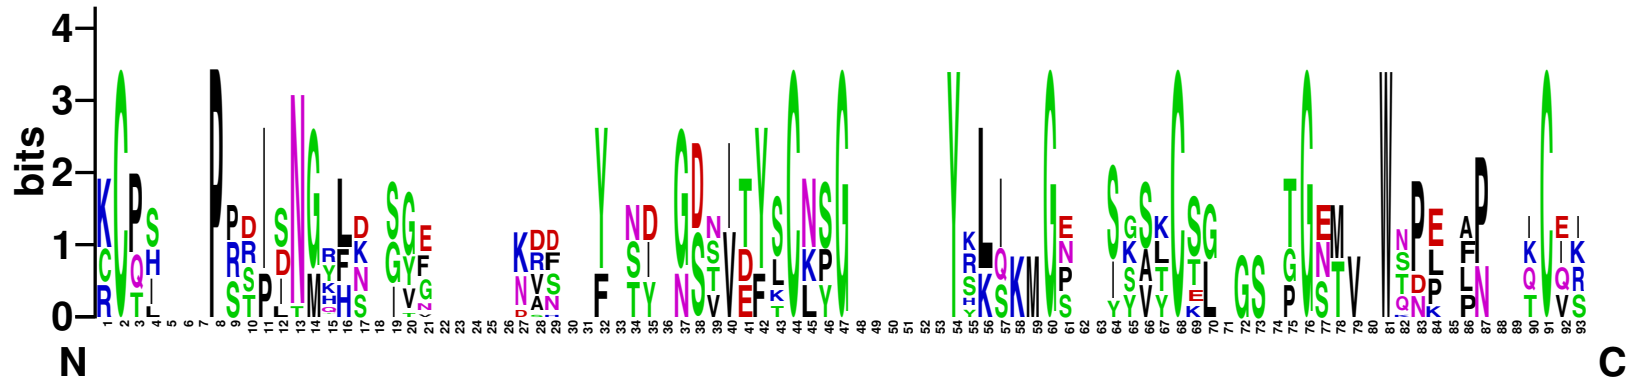

Supplement: mmc4.pdf [file mmc4.pdf]

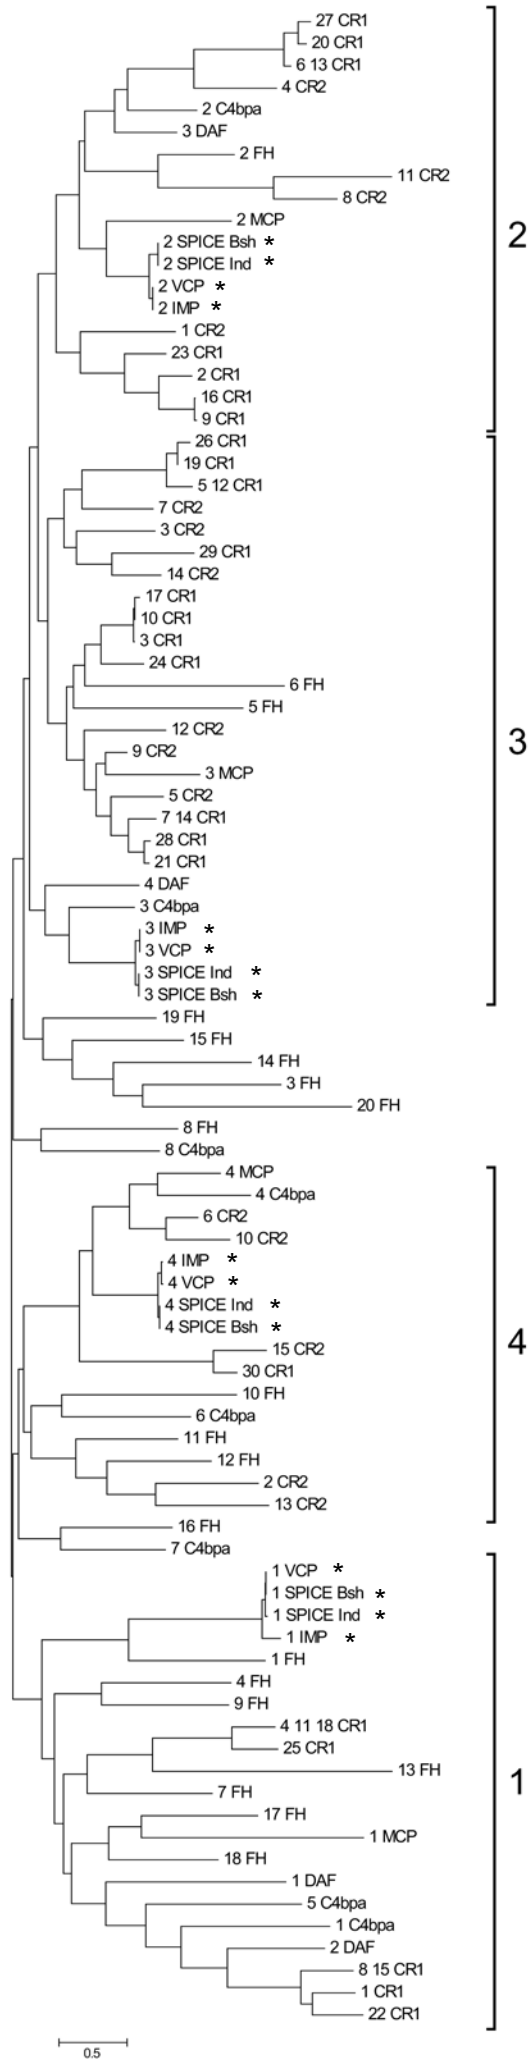

Supplement: mmc6.pdf [file mmc6.pdf]
